# Supplementary material for: Impact of a DSS-supported medication review on the safety of drug therapy and quality of life in patients with antithrombotic therapy
Source: Front Pharmacol. 2024 May 23;15:1194201. doi: 10.3389/fphar.2024.1194201 (PMC11153675; doi:10.3389/fphar.2024.1194201)
Supplement: Supplementary file 1 [file Table1.docx]

Supplementary Material

Medication use, classified by ATC-Code level 2
WHO Collaborating Center for Drug Statistics and Methodology, 2019

**Tanja Elnaz Hassanzadeh1,2 *, Carina Hohmann3 and Carsten Culmsee2 ****

1Pharma4u GmbH, Ismaninger Str. 3, Rgb., 81675 Munich, Germany

2Pharmacology and Clinical Pharmacy, Dept. of Pharmacy, University of Marburg, 35032 Marburg, Germany

3Department of Pharmacy, Klinikum Fulda gAG, 36043 Fulda, Germany

*** Correspondence:**Tanja Elnaz Hassanzadeh
hassanzadeh@wir-machen-amts.de

**** Co-Correspondence:**Carsten Culmsee
culmsee@staff.uni-marburg.de

# Supplementary Table

| **ATC-Code Level** | **Medication Class** | **Number of Patients** | **Frequency (%)** |
| --- | --- | --- | --- |
| **B01** | Antithrombotic agents | 87 | 100 |
| **C10** | Agents that influence lipid metabolism | 64 | 73.6 |
| **C09** | Agents with effect on the RAAS system | 61 | 70.1 |
| **C07** | ß-adrenoceptor antagonists | 40 | 46.0 |
| **N02** | Analgesics | 38 | 43.7 |
| **A02** | Remedy for acid-related diseases | 34 | 39.1 |
| **C03** | Diuretics | 28 | 32.2 |
| **C08** | Calcium channel blocker | 26 | 29.9 |
| **A10** | Antidiabetics | 25 | 28.7 |
| **H03** | Thyroid therapy | 24 | 27.6 |
| **N06** | Psychoanaleptics | 22 | 25.3 |
| **A11** | Vitamins | 21 | 24.1 |
| **A12** | Minerals | 21 | 24.1 |
| **R03** | Remedy for obstructive respiratory diseases | 20 | 23.0 |
| **G04** | Urologics | 16 | 18.4 |
| **N05** | Psycholeptics | 12 | 13.8 |
| **M04** | Gout remedies | 11 | 12.6 |
| **A06** | Agents against constipation | 9 | 10.3 |
| **C01** | Cardiac therapy | 9 | 10.3 |
